1 **Clinical and biomarker changes in sporadic Alzheimer's disease:**  
2 **Amyloid- $\beta$  not useful marker for disease onset or progression**

3 Junjie Zhuo<sup>1,2</sup>; Yuanchao Zhang<sup>5</sup>; Bing Liu<sup>1,3,4</sup>; Yong Liu<sup>1,3,4</sup>; Xiaoqing Zhou<sup>2</sup>; Perry F.  
4 Bartlett<sup>2\*</sup>; Tianzi Jiang<sup>1-5\*</sup>; and the Alzheimer's Disease Neuroimaging Initiative\*

5 <sup>1</sup>Brainnetome Center, Institute of Automation, Chinese Academy of Sciences, Beijing  
6 100190, China

7 <sup>2</sup>The Queensland Brain Institute, University of Queensland, Brisbane, QLD 4072,  
8 Australia

9 <sup>3</sup>University of Chinese Academy of Sciences, Beijing 100049, China

10 <sup>4</sup>CAS Center for Excellence in Brain Science, Institute of Automation, Chinese Academy  
11 of Sciences, Beijing 100190, China

12 <sup>5</sup> The Clinical Hospital of Chengdu Brain Science Institute, MOE Key Lab for  
13 Neuroinformation, University of Electronic Science and Technology of China, Chengdu  
14 625014, China

15 \* Tianzi Jiang and Perry F. Bartlett are the corresponding authors.

16

17 **Group Information:**

18 \*Data used in preparation of this article were obtained from the Alzheimer's Disease  
19 Neuroimaging Initiative (ADNI) database ([adni.loni.usc.edu](http://adni.loni.usc.edu)). As such, the investigators  
20 within the ADNI contributed to the design and implementation of ADNI and/or provided data  
21 but did not participate in analysis or writing of this report.

22 A complete listing of ADNI investigators can be found at: [http://adni.loni.usc.edu/wp-  
23 content/uploads/how\\_to\\_apply/ADNI\\_Acknowledgement\\_List.pdf](http://adni.loni.usc.edu/wp-content/uploads/how_to_apply/ADNI_Acknowledgement_List.pdf).

24

25 **Corresponding author:**

26 Tianzi Jiang, PhD, Brainnetome Center, Institute of Automation, Chinese Academy of  
27 Sciences, Beijing 100190, China (Phone: +86-1-82544778, Fax: +86-1 82544777, Email:  
28 [jiangtz@nlpr.ia.ac.cn](mailto:jiangtz@nlpr.ia.ac.cn))

29 Perry F. Bartlett, PhD, Queensland Brain Institute, The University of Queensland, Qld, 4072,  
30 Australia (Phone: +617 3346-6311, Email: [p.bartlett@uq.edu.au](mailto:p.bartlett@uq.edu.au))

31

32 **Abstract**

33 The failure of all anti-amyloid- $\beta$  ( $A\beta$ ) drugs has led to a debate about the central role of amyloid  
34 in sporadic Alzheimer's disease (SAD). In order to resolve this issue, it is necessary to evaluate  
35 the impact of  $A\beta$  biomarkers on SAD by measuring the dynamic changes in biomarkers and  
36 clinical profiles in the progression of SAD. We identified a clearer picture of the clinical and  
37 biomarker changes in the progression of SAD by aligning the clinical diagnosis of mild cognitive  
38 impairment (MCI) or AD onset. We found that changes in hippocampal volume and FDG, rather  
39 than  $A\beta$  biomarkers, were associated with the changes in clinical measures in the progression of  
40 SAD. In addition, cognitively normal people with elevated and with normal amyloid showed no  
41 significant differences in clinical measures, hippocampal volume, or FDG. This study reveals  
42 that  $A\beta$  is not a useful biomarker for predicting the clinical progression of patients who develop  
43 SAD.

44

## 45 **Introduction**

46 The diagnostic guidelines for Alzheimer's disease (AD)<sup>1,2</sup> provide a clinical-pathological  
47 framework. The National Institute on Aging-Alzheimer's Association (NIA-AA), in line with  
48 the amyloid hypothesis<sup>3,4</sup>, defines AD on the basis of biomarkers, rather than by clinical  
49 symptoms<sup>5</sup>. However, two observations, the failure of all anti-amyloid- $\beta$  (A $\beta$ ) drugs<sup>6-10</sup> to show  
50 clinical efficacy and the discovery that amyloid plaques are not unique to AD<sup>11</sup>, have led to a  
51 debate about the central role of amyloid in the etiology of the disease and its usefulness as a  
52 diagnostic marker of AD.

53 To address this debate, identifying which dynamic changes in biomarkers and clinical profiles  
54 correlate directly with the progression of AD is essential. The relevant studies have primarily  
55 relied on patients with autosomal dominant AD (ADAD), who often have a predictable age at  
56 onset<sup>12-14</sup>. In contrast, the precise timing of the disease for patients with sporadic AD (SAD) is  
57 difficult to predict<sup>15</sup>. Because the ADAD genetic mutations (*APP*, *PSEN1*, and *PSEN2*) cause  
58 alterations in A $\beta$  processing, ADAD studies have consistently found that A $\beta$  is the first and key  
59 biomarker, followed by changes in other biomarkers and clinical profiles<sup>12-14</sup>. However,  
60 increasing evidence has shown that patients with SAD are associated with multiple gene factors,  
61 which affect more than A $\beta$  processing<sup>11,16-18</sup>. Since ADAD only accounts for a very small  
62 proportion (approximately 1%) of AD<sup>12</sup>, how widely applicable the findings obtained from  
63 ADAD are to SAD remains a question<sup>11</sup>.

64 A previous prospective SAD study based the stage of AD on the level of accumulation of  
65 amyloid and found, consistent with ADAD studies, that the A $\beta$  abnormality appeared first,

66 followed by other changes<sup>19</sup>. However, this approach was flawed due to its assumption that A $\beta$   
67 is the etiological agent, which does not consider the possible dynamic biomarker and clinical  
68 changes which occur in relation to symptom onset as in the previous ADAD studies<sup>12-14</sup>. Even  
69 in subjects who have over 15 years of longitudinal data, the baseline has not been aligned  
70 with the onset of clinical symptom to investigate longitudinal changes in biomarkers and  
71 clinical profiles<sup>20</sup>. However, as the progression of AD has been hypothesized to be  
72 non-linear<sup>21,22</sup>, simply aligning the baseline with A $\beta$  levels or studying the longitude data is not  
73 sufficient to chart the progression of SAD. Thus, in the current study we aligned the timepoints  
74 of the clinical diagnosis of mild cognitive impairment (MCI) or AD onset to investigate the  
75 dynamic changes that occur from cognitively normal (CN) to MCI and from MCI to AD.

## 76 **Results**

77 **Characteristics of Study Participants.** Data of the downloaded 665 subjects from the ADNI  
78 dataset, we utilized the data from 663 participants in the group analysis (CN: 294, CN2MCI:  
79 69, and MCI2AD: 300, for more details of the participants' characteristics see Table 1) and 24  
80 CN2MCI2AD participants in the individual analysis (the data from the group of 22  
81 participants in the CN2MCI stage was combined into the above CN2MCI group analysis).  
82 Some participants were followed for up to 13 years with a mean follow-up period of 4.90  $\pm$   
83 2.83 years.

84 **Estimated group trajectories of clinical profiles and biomarkers in the progression of**  
85 **SAD.** Figure 1 shows the trajectories of the biomarkers estimated by the linear mixed  
86 effects models across groups (for the spaghetti plot of the raw data, see eFigure 2). Consistent

87 with the clinical profiles of AD progression, the hippocampal volume and FDG levels  
88 remained stable throughout the CN stage followed by slow, non-linear changes in the  
89 CN2MCI stage and rapid non-linear changes in the MCI2AD. In contrast, florbetapir PET and  
90 the CSF biomarkers did not show changes consistent with the clinical profile. The details of  
91 the linear mixed model for each biomarker are displayed in eTables 1-9.

92 The CN, CN2MCI, and MCI2AD subgroups' medians (interquartile range [IQR]) annual  
93 change in ADAS13 were (0.388 [-0.278, 0.818], 1.000 [0.239, 2.330], and 3.388 [1.750, 6.169],  
94  $p < .001$ , respectively). The annual changes in CDRSB for each group were (0.000 [0.000,  
95 0.000], 0.214 [0.100, 0.500], and 1.250 [0.750, 2.000],  $p < .001$ , respectively). The annual  
96 changes in MMSE for each group were (0.000 [-0.250, 0.161], -0.286 [-0.571, 0.000], and  
97 -1.500 [-2.775, -0.800],  $p < .001$ , respectively). The annual changes in hippocampal volume for  
98 each group were (-0.005 %ICV [-0.011, -0.001], -0.006 %ICV [-0.012, -0.002], and  
99 -0.014 %ICV [-0.021, -0.009],  $p < .001$ , respectively). The annual changes in FDG PET SUVR  
100 for each group were (-0.011 [-0.030, 0.010], -0.027 [-0.056, -0.012], and -0.039 [-0.063, 0.014],  
101  $p < .001$ , respectively). The annual changes in Florbetapir PET SUVR for each group were  
102 (0.004 [-0.002, 0.012], 0.004 [-0.001, 0.011], and 0.005 [-0.006, 0.014],  $p = .840$ , respectively).  
103 The annual changes in CSF A $\beta_{42}$  for each group were (-1.500 pg/ml [-6.000, 4.000], -2.200  
104 [-5.667, 4.000], and -2.000 [-7.000, 2.650],  $p = .564$ , respectively). The annual changes in CSF  
105 tau for each group were (0.775 pg/ml [-1.887, 4.500], 2.150 [-0.500, 7.900], and 3.000 [-3.900,  
106 14.175],  $p = .121$ , respectively). The annual changes in CSF ptau for each group were (1.050  
107 pg/ml [-1.450, 4.500], 1.980 [-0.200, 5.050], and 1.408 [-1.321, 8.325],  $p = .628$ , respectively).

108 **Estimated elevated and normal amyloid group trajectories of clinical profiles and**  
109 **biomarkers in the progression of SAD.** Figure 2 shows the trajectories of the biomarker  
110 changes in relationship to either the normal or elevated amyloid groups. Qualitatively, the  
111 pattern remained stable in the CN, exhibited slow non-linear changes in the CN2MCI, and  
112 ended with a phase in which rapid non-linear changes appeared in the MCI2AD. We found no  
113 significant differences in the clinical profiles, hippocampal volume, or FDG changes between  
114 the elevated and normal amyloid subjects at the  $p < .05$  level. The statistical results showed  
115 no difference for CDRSB and FDG in any of the three (CN, CN2MCI, and MCI2AD)  
116 subgroups at  $p < .05$ . The ADAS13 analysis showed significant group differences for the  
117 6-9-year time period in the CN subgroup, for the  $< -4.5$  and  $> 4$  years to onset time in the  
118 CN2MCI subgroup, and for the  $> -0.5$  years to onset time in the MCI2AD subgroup at  $p < .05$ .  
119 The MMSE analysis showed a significant group difference for the time period  $> -1$  year in the  
120 CN2MCI subgroup at  $p < .05$ . Although the likelihood ratio test showed a significant  
121 difference in hippocampal volume between the elevated and normal amyloid subjects ( $p$   
122  $=.047$ ), the post-hoc results showed no significance at  $p < .05$  in the CN2MCI and only  
123 showed a significant group difference for the time period  $< -1$  years in the MCI2AD at  $p < .05$ .  
124 All subgroups showed obvious significant differences with respect to florbetapir PET and  
125 CSF  $A\beta_{42}$  between the elevated and normal amyloid subjects at  $p < .001$ . For CSF Tau and  
126 CSF Ptau, only the CN2MCI subgroup showed no amyloid effect at  $p < .05$ ; the other two  
127 subgroups showed significant differences at  $p < .05$  (Figure 2; for the post hoc analysis results,  
128 see eTables 10-15).

129 **Changes in  $A\beta$  biomarkers were not associated with changes in ADAS13 during the**

130 **disease status conversion.** We found that the changes in the CDRSB (Figure 3.1A and 2A),  
131 MMSE (Figure 3.1B and 3.2B), hippocampal volume (Figure 3.1C and 3.2C), and FDG PET  
132 in the post-cingulate cortex (Figure 3.1D and 3.2D) were associated with the change in the  
133 ADAS13 in both the CN2MCI and MCI2AD subgroups. However, the changes in the  
134 amyloid related biomarkers florbetapir PET and CSF A $\beta$ <sub>42</sub> were not significantly associated  
135 with the change in the ADAS13 in either group (Figure 3.1 E, 3.1F, 3.2 E, and 3.2 F).

136 **Temporal evolution of relative abnormality in clinical measures and biomarkers.**

137 Combining the biomarker findings, we assessed the trajectories and order of  
138 pathophysiological changes for the clinical, imaging, and biochemical measures (Figure 4.A  
139 and 4.B). As can be seen in Figures 1 and 2, the clinical profiles, hippocampal volume, and  
140 FDG changed slowly in the initial stage of CN2MCI and accelerated in the late MCI2AD  
141 stage. The order in which these measures changed in the CN2MCI subgroup was that the  
142 hippocampus and FDG PET changed earlier than ADAS13 and that CDRSB and MMSE were  
143 the last measures to change. Further, a *post hoc* analysis showed that the change in  
144 hippocampal volume preceded the symptom onset of MCI by 2.5 years and ADAS13  
145 preceded the symptom onset of MCI by 1 year. Significant changes in MMSE and CDRSB  
146 were concurrent with MCI onset (Figure 5). Even in patients with elevated amyloid, the  
147 trajectory of the amyloid-related biomarker was not consistent with the clinical profiles,  
148 hippocampal volume, or FDG (Figure 4.B). More importantly, florbetapir PET was stable  
149 during the CN2MCI stage. Although CSF A $\beta$ <sub>42</sub> showed some nonlinear changes before MCI  
150 onset, the change was smaller than those of the other biomarkers. Thus, these results do not  
151 support previous reports<sup>12,13</sup>, suggesting that amyloid-related biomarker changes largely lead



152 other biomarker changes at the onset of the disease.

153 **Within-individual trajectories of clinical measures and biomarkers.** We further assessed  
154 each biomarker for the individuals who progressed from CN to MCI and to AD for each  
155 biomarker (Figure 4.C and eFigure 3). The mean time for conversions from MCI to AD was  
156  $2.44 \pm 1.49$  (range 1-7) years in these 24 subjects. The individual results were consistent with  
157 the previous group results: The trajectories of their clinical profiles changed slowly in the  
158 initial period in the CN2MCI stage and accelerated in the MCI2AD stage, the dynamic  
159 changes of hippocampal volume paralleled the disease status changes, and there were no  
160 significant changes in amyloid-related biomarkers in the CN to MCI to AD progression.

## 161 **Discussion**

162 Identifying the dynamic changes in clinical assessments and biomarkers during a patient's  
163 progression to AD is critical for defining the stage of the disease and its etiology and for  
164 monitoring the efficacy of potential therapies. In the present study, we avoided preconceptions  
165 about disease etiology and aligned the clinical symptom onset timepoints of the different  
166 stages from CN, through MCI, to AD using various clinical assessments and biomarkers to  
167 obtain a panorama of disease progression. One of the most surprising and important results  
168 from our study is the consistent finding that amyloid biomarkers (CSF A $\beta_{42}$  and florbetapir  
169 PET) were not useful biomarkers for predicting clinical changes from CN to MCI or from  
170 MCI to AD in SAD.

171 These results suggest that SAD is a clinical-pathological entity<sup>16</sup>, the stages of which cannot  
172 be defined using in vivo amyloid biomarkers. First, the accumulation of amyloid in the CN

173 did not predict future cognitive impairment in either people who maintained a stable CN or  
174 those in the CN2MCI stage (Figure 2.A-C). This result is consistent with recent reports that  
175 indicated that brain A $\beta$  is not clinically relevant<sup>23,24</sup>. Other studies, however, reported that  
176 elevated amyloid in CN individuals was associated with a higher likelihood of cognitive  
177 decline compared with normal amyloid CN subjects<sup>25,26</sup>. Although these findings are  
178 insightful, using the same ADNI dataset, we found that cognitive decline did not depend on  
179 the accumulation of amyloid but on the clinical stage of the disease. Therefore, it appears  
180 evident that we cannot determine whether CN subjects are in a preclinical stage based on the  
181 accumulation of amyloid alone. Second, dynamic changes in amyloid-related biomarkers  
182 were not associated with a change in disease status even in elevated amyloid subjects (Figures  
183 2.F, 2.G, 4.B, 4.C). A previous prospective study, based on the amyloid hypothesis, reported  
184 that brain A $\beta$  deposition continuously changed with SAD progression<sup>19</sup>. However, they found  
185 that the raw data of A $\beta$  deposition was stable and changed slowly<sup>19</sup>, a finding that is in  
186 keeping with our results. Finally, in our study the changes in clinical profiles, unlike the  
187 changes in amyloid-related biomarkers, reflected the disease status changes. Non-linear  
188 changes in clinical profiles were found in both the CN2MCI and MCI2AD stages (Figure  
189 1A-C, 4A). ADAS13 showed dramatic changes about 1 year before the clinical MCI onset, a  
190 finding which was not consistent with the general concept that clinical profiles change only  
191 after the onset of MCI<sup>21,22</sup>. Since SAD is a clinical-pathological entity and given previous  
192 evidence that neither clinical profiles<sup>5</sup> nor biomarkers<sup>11</sup> are unique to AD, we suggest that  
193 combining clinical and biomarkers to reveal individual longitudinal changes rather than  
194 depending on specific biomarkers or clinical profiles alone may be a better way to diagnose

195 SAD.

196 By assessing the full range from CN to MCI to AD, we found that the trajectory of  
197 hippocampal volume and FDG were consistent with the clinical profiles in that they did not  
198 follow a sigmoid curve<sup>21,22</sup> but rather showed a slow change in the initial stage and  
199 accelerated changes in the later stage from MCI to AD (Figure 4). Although previous studies  
200 based on the ADNI dataset reported that the changes in these biomarkers followed a sigmoid  
201 curve<sup>27-29</sup>, these studies did not align their findings with the stage of disease, so they could not  
202 be considered to accurately reflect the trajectory of biomarker changes that occur in the  
203 progression of AD.

204 Our finding that cognitive decline and A $\beta$  deposition did not occur in parallel (Figures 3 and 4)  
205 is consistent with previous studies that reported that A $\beta$  dysregulation poorly correlates with  
206 AD severity<sup>30</sup>, progressive neurodegeneration<sup>31</sup>, cognitive dysfunction<sup>32</sup>, or brain atrophy<sup>33</sup>.  
207 During the rapid cognitive decline from MCI to AD, A $\beta$  deposition only mildly increased.  
208 This may partially explain why anti-A $\beta$  drugs have failed in clinical trials. Medications, such  
209 as solanezumab, a medication designed to clear soluble A $\beta$  from the brain, are used in the  
210 mild AD stage<sup>10</sup>, which is too late to prevent rapid cognitive decline. Thus, the slow stage  
211 from pre-MCI to pre-AD may be a better time window for future drug design.

212 Our results suggest that applying ADAD results directly to SAD research may not be  
213 appropriate<sup>11</sup>. We found that the rate of A $\beta$  biomarker changes during CN conversion to MCI  
214 stage did not reflect those of other biomarkers and were not associated with clinical changes  
215 (Figure ). This result is not consistent with previous ADAD studies that found that amyloid

216 biomarkers undergo greater changes and lead to other biomarker changes in the initial stage of  
217 symptom onset<sup>12-14</sup>. The most likely explanation for this difference is that the ADAD and  
218 SAD have different etiologies<sup>11</sup>. In addition, we found that dramatic hippocampal atrophy  
219 starts 2.5 years prior to MCI onset, which is later than recent ADAD brain atrophy  
220 findings<sup>14,15</sup>. The concept that AD involves a long pre-symptomatic period and is derived from  
221 ADAD studies<sup>16</sup> may need to be reconsidered.

222 One of the limitations of the current study is that the CN2MCI subgroup was older than the  
223 MCI2AD subgroup, which may have influenced the pattern of biomarker changes. The  
224 ongoing ADNI dataset maybe resolve this limitation in future studies. Another limitation is  
225 the small sample size of the tau and A $\beta$  biomarkers in the pre-MCI stage, which meant that  
226 we could not fully reveal the dynamic changes in these biomarkers in the preclinical stage.  
227 The ongoing ADNI collection of plasma A $\beta$  biomarkers<sup>34</sup> and ADNI3 tau-related PET data<sup>35</sup>  
228 will improve the likelihood of fully understanding the preclinical stage of SAD in the future.

229 Whereas changes in hippocampal volume, FDG, and clinical profiles are useful markers of  
230 SAD progression, A $\beta$  is not a useful biomarker for predicting the clinical progression of  
231 patients who develop SAD.

## 232 **Methods**

### 233 **Study design**

234 The data were obtained from the ADNI dataset (<http://adni.loni.usc.edu/>) and downloaded in  
235 December 2018. The ADNI was launched in 2003 as a public-private partnership, led by

236 Principal Investigator Michael W. Weiner, MD. The primary goal of ADNI has been to test  
237 whether serial magnetic resonance imaging (MRI), PET, other biological markers, and clinical  
238 and neuropsychological assessment can be combined to measure the progression of MCI and  
239 early AD.

240 To estimate the timing, order, and trajectory of clinical and biomarker changes from normal  
241 aging to AD, we labeled the data of the three subgroups as CN, subjects with normal  
242 cognition who were confirmed to convert to MCI (CN2MCI), and subjects with MCI who  
243 were confirmed to convert to AD (MCI2AD). The CN subgroup was defined as either  
244 subjects who had a baseline that was cognitively normal, showed no significant memory  
245 concern (SMC), and had at least two years' follow-up without conversion to MCI or AD or as  
246 subjects with a baseline of MCI who reversed to CN within one year and remained stable CN  
247 for at least 2 years to the end of follow-up. The CN2MCI subgroup was defined as subjects  
248 with a baseline diagnosis of cognitively normal and a subsequent diagnosis of having  
249 converted to MCI in the follow-up or as subjects with a SMC confirmed as having converted  
250 to MCI. To increase the sample size and statistical power, the CN2MCI timepoint of subjects  
251 who converted to MCI and finally to AD were also included in the CN2MCI group. The  
252 MCI2AD subgroup was defined as subjects with a baseline diagnosis of MCI who converted  
253 to stable AD in the follow-up.

254 To precisely reflect the stage of disease, we selected those subjects within the CN2MCI and  
255 MCI2AD subgroups who had one year or less between the initial one-time assessment before  
256 the disease onset and the disease onset of MCI or AD.

257 **Assessments**

258 The clinical profiles and biomarkers used in the present study included the 13-item cognitive  
259 subscale of the Alzheimer's Disease Assessment Scale (ADAS13), Mini-Mental State  
260 Examination (MMSE), Clinical Dementia Rating Scale-Sum of Boxes (CDRSB),  
261 hippocampal volumes, fluorodeoxyglucose (FDG) positron emission tomography (PET),  
262 florbetapir PET, and CSF biomarkers (including tau, phosphor-tau (Ptau), and A $\beta$ <sub>42</sub>). FDG and  
263 florbetapir PET, were measured by the standardized uptake value ratio (SUVR). Please see  
264 the Supplementary materials for all the metadata downloaded from the ADNI dataset and the  
265 detailed assessment of each clinical profile and biomarker.

266 Participants were categorized into elevated amyloid or normal amyloid subsets depending on  
267 their florbetapir SUVR or CSF A $\beta$ <sub>42</sub> status. Elevated amyloid was defined as a florbetapir  
268 SUVR greater than 0.79<sup>36</sup> or a CSF A $\beta$ <sub>42</sub> value less than 192 pg/mL<sup>37</sup>. Participants were  
269 classified as having elevated amyloid if they met the cutoff threshold at any timepoint.  
270 Otherwise, they were classified as having normal amyloid. If there was no amyloid  
271 information for a participant, their data were classified as missing.

272 As the ADAS has usually been used to monitor the progression of AD<sup>8,10</sup>, we calculated the  
273 correlations between the ADAS13 and each marker in the CN2MCI and MCI2AD stages  
274 separately to evaluate whether the markers could predict AD progression.

275 To compare the progression curve for all the markers and verify the model of the fitted results,  
276 the scaled value for each marker was defined by (raw data – mean CN baseline value) / the  
277 standard deviation (SD) of the whole dataset. To further verify the abnormal pattern of the

278 markers in the progression of AD, we also analyzed the within-individual trajectories for all  
279 24 subjects who were initially diagnosed as CN, subsequently converted to MCI, and then to  
280 AD (CN2MCI2AD). Each marker in these individuals was also scaled by the mean of the  
281 baseline data for the CN subgroup and for the SD of the entire dataset.

## 282 **Statistical analysis**

283 For the longitudinal trajectory analyses of the CN2MCI and MCI2AD subgroups, the  
284 follow-up years were categorized into pre-symptom onset (<0 onset years) and post-symptom  
285 onset (>0 onset years). To increase model convergence, we excluded the data of timepoints  
286 for which the sample size was less than 3 for each clinical profile or biomarker, (See Fig. S1  
287 for the detailed sample size for the various timepoints for each clinical profile or biomarker)  
288 Statistical analyses and plotting were performed using R (version 3.5.3,  
289 <https://www.r-project.org/>)

290 Longitudinal trajectory models were constructed for the various biomarkers using linear  
291 mixed effects models<sup>38</sup>. For each marker, we started by fitting an appropriate function to the  
292 time (baseline or onset time) e.g.  $\text{time} + \text{time}^2 + \text{time}^3$ . Disease progression (CN, CN2MCI,  
293 and MCI2AD) was included in the models to extract disease-specific biomarker trajectories.  
294 Covariates such as age at baseline or onset year, sex, APOEε4, and education were included  
295 as confounds, and a backward elimination method was used for model selection. We then  
296 selected a structure for the random effects and covariance structure for the residuals in the  
297 model. All the model selections were based on the Akaike Information Criterion<sup>15,39</sup>, an  
298 objective model selection tool. Maximum likelihood was used to fit the mixed-effect models

299 as it is robust to the absence of random data<sup>25</sup>.

300 We further compared the trajectories for each marker in the progression of AD to uncover  
301 differences between the elevated amyloid and normal amyloid groups. The overall amyloid  
302 effect was tested using likelihood ratio tests that compared the full model to a reduced model  
303 with no amyloid factor in each subgroup for each marker. For any subgroup that showed a  
304 significant amyloid effect as the disease progressed, a supplementary *post hoc* analysis was  
305 performed between the elevated amyloid and normal amyloid groups at each timepoint based  
306 on the estimated marginal means derived from the model.

307 To determine the timing of the dysfunctions, we fitted a linear mixed effects model to the  
308 CN2MCI subgroup with time as a categorical variable for each biomarker. The *post hoc*  
309 analysis was conducted between each timepoint based on estimated marginal means derived  
310 from the model.

311 **Author Contributions:** T.J. and P.F.B. supervised the study. J.Z., P.F.B., and T.J. were  
312 responsible for the design of the concept and the study. J.Z. contribution to the data analysis  
313 and statistical analysis; Y.Z., B.L., Y.L., and X.Z. made substantial contributions to the  
314 discussion on the results and the manuscript; J.Z., P.F.B., and T.J. wrote the manuscript.

315 **Acknowledgments:** This work was partially supported by the Natural Science Foundation of  
316 China (Grant Nos. 31620103905 and 81701781), the Science Frontier Program of the Chinese  
317 Academy of Sciences (Grant No. QYZDJ-SSW-SMC019), the Guangdong Pearl River  
318 Talents Plan (2016ZT06S220), and the International Postdoctoral Exchange Fellowship  
319 Program 2017 by the Office of China Postdoctoral Council.



320 Data collection and sharing for this project was funded by the Alzheimer's Disease  
321 Neuroimaging Initiative (ADNI) (National Institutes of Health Grant U01 AG024904) and  
322 DOD ADNI (Department of Defense award number W81XWH-12-2-0012). ADNI is funded  
323 by the National Institute on Aging, the National Institute of Biomedical Imaging and  
324 Bioengineering, and through generous contributions from the following: AbbVie, Alzheimer's  
325 Association; Alzheimer's Drug Discovery Foundation; Araclon Biotech; BioClinica, Inc.;  
326 Biogen; Bristol-Myers Squibb Company; CereSpir, Inc.; Cogstate; Eisai Inc.; Elan  
327 Pharmaceuticals, Inc.; Eli Lilly and Company; EuroImmun; F. Hoffmann-La Roche Ltd and  
328 its affiliated company Genentech, Inc.; Fujirebio; GE Healthcare; IXICO Ltd.; Janssen  
329 Alzheimer Immunotherapy Research & Development, LLC.; Johnson & Johnson  
330 Pharmaceutical Research & Development LLC.; Lumosity; Lundbeck; Merck & Co., Inc.;  
331 Meso Scale Diagnostics, LLC.; NeuroRx Research; Neurotrack Technologies; Novartis  
332 Pharmaceuticals Corporation; Pfizer Inc.; Piramal Imaging; Servier; Takeda Pharmaceutical  
333 Company; and Transition Therapeutics. The Canadian Institutes of Health Research is  
334 providing funds to support ADNI clinical sites in Canada. Private sector contributions are  
335 facilitated by the Foundation for the National Institutes of Health ([www.fnih.org](http://www.fnih.org)). The grantee  
336 organization is the Northern California Institute for Research and Education, and the study is  
337 coordinated by the Alzheimer's Therapeutic Research Institute at the University of Southern  
338 California. ADNI data are disseminated by the Laboratory for Neuro Imaging at the  
339 University of Southern California.

340 We thank Dr. Alan Ho who help statistical analysis, Dr. Wen Zhang who help access the data,  
341 Dr. Lingzhong Fan who offered constructive comments, and Dr. Rhoda E., Edmund F. Perozzi,

342 and Rowan Tweedale for their editing assistance and discussions.

343 **Conflict of interest:** The authors declare that they have no competing financial interests.

## 344 **References**

- 345 1. McKhann, G.M., *et al.* The diagnosis of dementia due to Alzheimer's disease:  
346 recommendations from the National Institute on Aging-Alzheimer's Association  
347 workgroups on diagnostic guidelines for Alzheimer's disease. *Alzheimers Dement* **7**,  
348 263-269 (2011).
- 349 2. Dubois, B., *et al.* Advancing research diagnostic criteria for Alzheimer's disease: the  
350 IWG-2 criteria. *Lancet Neurol* **13**, 614-629 (2014).
- 351 3. Hardy, J.A. & Higgins, G.A. Alzheimer's disease: the amyloid cascade hypothesis.  
352 *Science* **256**, 184-185 (1992).
- 353 4. Selkoe, D.J. & Hardy, J. The amyloid hypothesis of Alzheimer's disease at 25 years.  
354 *EMBO Mol Med* **8**, 595-608 (2016).
- 355 5. Jack, C.R., Jr., *et al.* NIA-AA Research Framework: Toward a biological definition of  
356 Alzheimer's disease. *Alzheimers Dement* **14**, 535-562 (2018).
- 357 6. Panza, F., Lozupone, M., Seripa, D. & Imbimbo, B.P. Amyloid-beta immunotherapy for  
358 alzheimer disease: Is it now a long shot? *Ann Neurol* **85**, 303-315 (2019).
- 359 7. Panza, F., Lozupone, M., Logroscino, G. & Imbimbo, B.P. A critical appraisal of  
360 amyloid-beta-targeting therapies for Alzheimer disease. *Nat Rev Neurol* **15**, 73-88  
361 (2019).
- 362 8. Egan, M.F., *et al.* Randomized Trial of Verubecestat for Mild-to-Moderate Alzheimer's

- 363 Disease. *N Engl J Med* **378**, 1691-1703 (2018).
- 364 9. Egan, M.F., *et al.* Randomized Trial of Verubecestat for Prodromal Alzheimer's  
365 Disease. *N Engl J Med* **380**, 1408-1420 (2019).
- 366 10. Honig, L.S., *et al.* Trial of Solanezumab for Mild Dementia Due to Alzheimer's Disease.  
367 *N Engl J Med* **378**, 321-330 (2018).
- 368 11. Morris, G.P., Clark, I.A. & Vissel, B. Questions concerning the role of amyloid-beta in  
369 the definition, aetiology and diagnosis of Alzheimer's disease. *Acta Neuropathologica*  
370 **136**, 663-689 (2018).
- 371 12. Bateman, R.J., *et al.* Clinical and biomarker changes in dominantly inherited  
372 Alzheimer's disease. *N Engl J Med* **367**, 795-804 (2012).
- 373 13. Yau, W.W., *et al.* Longitudinal assessment of neuroimaging and clinical markers in  
374 autosomal dominant Alzheimer's disease: a prospective cohort study. *Lancet Neurol*  
375 **14**, 804-813 (2015).
- 376 14. McDade, E., *et al.* Longitudinal cognitive and biomarker changes in dominantly  
377 inherited Alzheimer disease. *Neurology* **91**, e1295-e1306 (2018).
- 378 15. Gordon, B.A., *et al.* Spatial patterns of neuroimaging biomarker change in individuals  
379 from families with autosomal dominant Alzheimer's disease: a longitudinal study.  
380 *Lancet Neurol* **17**, 241-250 (2018).
- 381 16. Ryan, N.S., Rossor, M.N. & Fox, N.C. Alzheimer's disease in the 100 years since  
382 Alzheimer's death. *Brain* **138**, 3816-3821 (2015).
- 383 17. Jansen, I.E., *et al.* Genome-wide meta-analysis identifies new loci and functional  
384 pathways influencing Alzheimer's disease risk. *Nature Genetics* **51**, 404-413 (2019).

- 385 18. Heart, C.F., Genetic, Ad, E.R.I., Genetic, P.D. & Perades. Genetic meta-analysis of  
386 diagnosed Alzheimer's disease identifies new risk loci and implicates A $\beta$ , tau,  
387 immunity and lipid processing. *Nature Genetics* **51**, 414-430 (2019).
- 388 19. Villemagne, V.L., *et al.* Amyloid beta deposition, neurodegeneration, and cognitive  
389 decline in sporadic Alzheimer's disease: a prospective cohort study. *Lancet Neurol* **12**,  
390 357-367 (2013).
- 391 20. Veitch, D.P., *et al.* Understanding disease progression and improving Alzheimer's  
392 disease clinical trials: Recent highlights from the Alzheimer's Disease Neuroimaging  
393 Initiative. *Alzheimers Dement* **15**, 106-152 (2019).
- 394 21. Jack, C.R., Jr., *et al.* Tracking pathophysiological processes in Alzheimer's disease:  
395 an updated hypothetical model of dynamic biomarkers. *Lancet Neurol* **12**, 207-216  
396 (2013).
- 397 22. Jack, C.R., Jr., *et al.* Hypothetical model of dynamic biomarkers of the Alzheimer's  
398 pathological cascade. *Lancet Neurol* **9**, 119-128 (2010).
- 399 23. Jansen, W.J., *et al.* Association of Cerebral Amyloid-beta Aggregation With Cognitive  
400 Functioning in Persons Without Dementia. *JAMA Psychiatry* **75**, 84-95 (2018).
- 401 24. Dubois, B., *et al.* Cognitive and neuroimaging features and brain  $\beta$ -amyloidosis in  
402 individuals at risk of Alzheimer's disease (INSIGHT-preAD): a longitudinal  
403 observational study. *Lancet Neurol* **17**, 335-346 (2018).
- 404 25. Donohue, M.C., *et al.* Association Between Elevated Brain Amyloid and Subsequent  
405 Cognitive Decline Among Cognitively Normal Persons. *JAMA* **317**, 2305-2316 (2017).
- 406 26. Insel, P.S., *et al.* Amyloid pathology in the progression to mild cognitive impairment.

- 407            *Neurobiol Aging* **64**, 76-84 (2018).
- 408    27.    Caroli, A., Frisoni, G.B. & Alzheimer's Disease Neuroimaging, I. The dynamics of  
409            Alzheimer's disease biomarkers in the Alzheimer's Disease Neuroimaging Initiative  
410            cohort. *Neurobiol Aging* **31**, 1263-1274 (2010).
- 411    28.    Schuff, N., *et al.* Nonlinear time course of brain volume loss in cognitively normal and  
412            impaired elders. *Neurobiol Aging* **33**, 845-855 (2012).
- 413    29.    Jack, C.R., Jr., *et al.* Shapes of the trajectories of 5 major biomarkers of Alzheimer  
414            disease. *Arch Neurol* **69**, 856-867 (2012).
- 415    30.    Arriagada, P.V., Growdon, J.H., Hedley-Whyte, E.T. & Hyman, B.T. Neurofibrillary  
416            tangles but not senile plaques parallel duration and severity of Alzheimer's disease.  
417            *Neurology* **42**, 631-631 (1992).
- 418    31.    Holmes, C., *et al.* Long-term effects of A $\beta$ 42 immunisation in Alzheimer's disease:  
419            follow-up of a randomised, placebo-controlled phase I trial. *The Lancet* **372**, 216-223  
420            (2008).
- 421    32.    Giannakopoulos, P., *et al.* Tangle and neuron numbers, but not amyloid load, predict  
422            cognitive status in Alzheimer's disease. *Neurology* **60**, 1495-1500 (2003).
- 423    33.    Jack, C.R., Jr., *et al.* Serial PIB and MRI in normal, mild cognitive impairment and  
424            Alzheimer's disease: implications for sequence of pathological events in Alzheimer's  
425            disease. *Brain* **132**, 1355-1365 (2009).
- 426    34.    Nakamura, A., *et al.* High performance plasma amyloid- $\beta$  biomarkers for Alzheimer's  
427            disease. *Nature* **554**, 249-254 (2018).
- 428    35.    Scholl, M., *et al.* PET Imaging of Tau Deposition in the Aging Human Brain. *Neuron* **89**,

- 429 971-982 (2016).
- 430 36. Landau, S.M., Horng, A., Jagust, W.J. & Alzheimer's Disease Neuroimaging, I.  
431 Memory decline accompanies subthreshold amyloid accumulation. *Neurology* **90**,  
432 e1452-e1460 (2018).
- 433 37. Shaw, L.M., *et al.* Cerebrospinal fluid biomarker signature in Alzheimer's disease  
434 neuroimaging initiative subjects. *Ann Neurol* **65**, 403-413 (2009).
- 435 38. West, B.T., Welch, K.B. & Galecki, A.T. *Linear mixed models: a practical guide using*  
436 *statistical software*, (Chapman and Hall/CRC, 2014).
- 437 39. Akaike, H. Information theory and an extension of the maximum likelihood principle. in  
438 *Selected papers of hirotugu akaike* 199-213 (Springer, 1998).
- 439

440 **Table**

|                                            | CN                              | CN2MCI                           | MCI2AD                          | <i>p</i> |
|--------------------------------------------|---------------------------------|----------------------------------|---------------------------------|----------|
|                                            | N=294                           | N=69 (22 finally to AD)          | N=300                           |          |
| <b>Sex:</b>                                |                                 |                                  |                                 | .058     |
| <b>Female</b>                              | 146 (49.7%)                     | 28 (40.6%)                       | 121 (40.3%)                     |          |
| <b>Male</b>                                | 148 (50.3%)                     | 41 (59.4%)                       | 179 (59.7%)                     |          |
| <b>Education, mean (SD), y</b>             | 16.5 (2.68)                     | 16.1 (2.67)                      | 15.9 (2.80)                     | .032     |
| <b>APOE allele:</b>                        |                                 |                                  |                                 | <.001    |
| <b>APOEε4 noncarriers</b>                  | 221 (75.2%)                     | 42 (60.9%)                       | 98 (32.7%)                      |          |
| <b>APOEε4 carriers</b>                     | 73 (24.8%)                      | 27 (39.1%)                       | 202 (67.3%)                     |          |
| <b>Follow-up, mean (SD), y</b>             | 5.33 (2.83)                     | 5.70 (3.43)                      | 4.07 (2.29)                     | <.001    |
| <b>Amyloid characteristics:</b>            |                                 |                                  |                                 | <.001    |
| <b>Missing amyloid information</b>         | 52 (17.7%)                      | 8 (11.6%)                        | 75 (25.0%)                      |          |
| <b>Elevated amyloid</b>                    | 115 (39.1%)                     | 41 (59.4%)                       | 202 (67.3%)                     |          |
| <b>Normal Amyloid</b>                      | 127 (43.2%)                     | 20 (29.0%)                       | 23 (7.7%)                       |          |
|                                            | <b>Baseline characteristics</b> | <b>MCI onset characteristics</b> | <b>AD onset characteristics</b> |          |
| <b>Age, mean (SD), y</b>                   | 74.0 (6.18)                     | 79.7 (5.70)                      | 76.5 (7.39)                     | <.001    |
| <b>ADAS13, mean (SD)</b>                   | 8.60 (4.04)                     | 15.0 (6.32)                      | 27.1 (7.36)                     | <.001    |
| <b>CDRSB, mean (SD)</b>                    | 0.06 (0.26)                     | 1.01 (0.76)                      | 4.30 (1.59)                     | <.001    |
| <b>MMSE, mean (SD)</b>                     | 29.1 (1.17)                     | 27.6 (1.83)                      | 23.8 (2.91)                     | <.001    |
| <b>Hippocampal volume, mean (SD), %ICV</b> | 0.50 (0.06)                     | 0.44 (0.05)                      | 0.37 (0.06)                     | <.001    |
| <b>FDG PET SUVR, mean (SD)</b>             | 1.41 (0.14)                     | 1.20 (0.15)                      | 1.16 (0.14)                     | <.001    |
| <b>Amyloid PET SUVR, mean (SD)</b>         | 0.78 (0.09)                     | 0.93 (0.14)                      | 1.01 (0.12)                     | <.001    |
| <b>CSF Aβ42, mean (SD), pg/ml</b>          | 207 (49.9)                      | 194 (79.0)                       | 137 (35.6)                      | <.001    |
| <b>CSF tau, mean (SD), pg/ml</b>           | 63.8 (29.2)                     | 90.4 (28.8)                      | 130 (75.9)                      | <.001    |
| <b>CSF ptau, mean (SD), pg/ml</b>          | 29.1 (14.7)                     | 39.2 (23.7)                      | 55.1 (30.7)                     | <.001    |

441 **Table 1. Characteristics of Study Participants**

442 Abbreviations: ADASA13, the 13-item cognitive subscale of the Alzheimer’s Disease  
443 Assessment Scale; CDRSB, the Clinical Dementia Rating Scale-Sum of Boxes; MMSE, the  
444 Mini-Mental State Examination; ICV, intracranial volume; FDG, fluorodeoxyglucose; CSF,  
445 cerebrospinal fluid; SUVR, standardized uptake value ratio; SD, standard deviation

446 **Figure legends**

447 **Figure 1. Estimated group trajectories of clinical profiles and biomarkers**

448 (A) ADAS13; range from 0 [best] to 85 [worst], (B) CDRSB; range from 0 [best] to 18  
449 [worst], (C) MMSE; range from 0 [worst] to 30 [best], (D) the MRI measures of hippocampal  
450 volumes adjusted by percent of the total intracranial volume (ICV), (E) the post-cingulate  
451 cortex glucose metabolism measured by fluorodeoxyglucose (FDG) positron emission  
452 tomography (PET) consistently showed stable changes in the stable cognitive normal (CN)  
453 subgroup, slow non-linear changes in the confirmed CN conversion to MCI (CN2MCI)

454 subgroup, and acceleration non-linear changes in the confirmed MCI conversion to AD  
455 (MCI2AD) subgroup. In contrast, (F) Florbetapir PET, (G) CSF A $\beta_{42}$ , (H) CSF tau, and (I)  
456 CSF phosphor-tau (Ptau) did not show changes consistent with the clinical profiles.  
457 The estimated trajectory and 95% confidence interval from the linear mixed models (yellow  
458 line and yellow shaded area, respectively) are plotted against years from baseline or symptom  
459 (MCI or AD) onset for each marker. The black dashed line represents the MCI onset timepoint.  
460 The red dashed line represents the AD onset timepoint.

461

462 **Figure 2. Estimated elevated and normal amyloid group trajectories of clinical profiles**  
463 **and biomarkers**

464 See Figure 1 for explanation of each panel sub-title.

465 The estimated trajectory and 95% confidence interval from the linear mixed models are  
466 plotted against years from baseline or symptom (MCI or AD) onset for each marker. Red line  
467 and pink shaded area represent the elevated amyloid subjects. Blue line and blue shaded area  
468 represent the normal amyloid subjects.

469 L.R.= likelihood ratio

470

471 **Figure 3. Relationship between the change in each biomarker and the change in**  
472 **ADAS13 in the CN conversion to MCI and the MCI conversion to AD subgroups**

473 The top panels show that the changes in the (1.A) CDRSB score, (1.B) MMSE score, (1.C)  
474 hippocampal volume percent of ICV, and (1.D) post-cingulate FDG SUVR value significantly  
475 correlated with the change in the ADAS13 scores in the CN conversion to MCI subgroup.  
476 However, the changes in the amyloid-related biomarkers, (1.E) Florbetapir PET SUVR and  
477 (1.F) CSF A $\beta_{42}$ , were not significantly correlated with the change in ADAS13 scores.

478 The bottom panels show that the change in the (2.A) CDRSB score, (2.B) MMSE score, (2.C)  
479 hippocampal volume percent of ICV, and (2.D) post-cingulate FDG SUVR value significantly  
480 correlated with the change in ADAS13 scores in the MCI conversion to AD subgroup.  
481 However, the changes in amyloid related biomarkers, (2.E) Florbetapir PET SUVR and (2.F)  
482 CSF A $\beta_{42}$ , were not significantly correlated with the change in ADAS13 scores.

483 df = degree of freedom

484

485 **Figure 4. Temporal evolution of marker changes and within-individual trajectories of**  
486 **marker changes**

487 Raw data for each biomarker and clinical profile converted to scaled values. The scaled value  
488 for each marker was defined by: (raw data – mean CN baseline value) / the standard deviation  
489 of the whole dataset.

490 (A) Clinical profiles, hippocampal volume, and FDG scaled changes in all subjects;

491 (B) Clinical profiles and biomarkers scaled changes in the elevated amyloid subjects;

492 Clinical profiles and biomarkers scaled changes in 4 subjects who included the entire disease  
493 process from CN conversion to MCI followed by conversion to AD (CN2MCI2AD),  
494 within-individual changes.

495

496 **Figure 5. Post hoc analysis results between the pre-MCI onset timepoint and all the**  
497 **CN2MCI subgroup timepoints for the clinical profiles and hippocampal volume**



498 The x-axis of each panel is the Dunnett-adjusted p value, and the y-axis is the years from  
499 MCI onset timepoint for hippocampal volume (Row A), ADAS13 (Row B), CDRSB (Row C),  
500 and MMSE (Row D). Each column represents the reference time for a stable stage timepoint  
501 in the CN2MCI subgroup. The line between two points in each panel indicates the p value of  
502 the t test for each marker between the two timepoints. The line located to the left of the p  
503 value on the x-axis indicates the significance level of the post hoc results between these two  
504 timepoints.

505

506

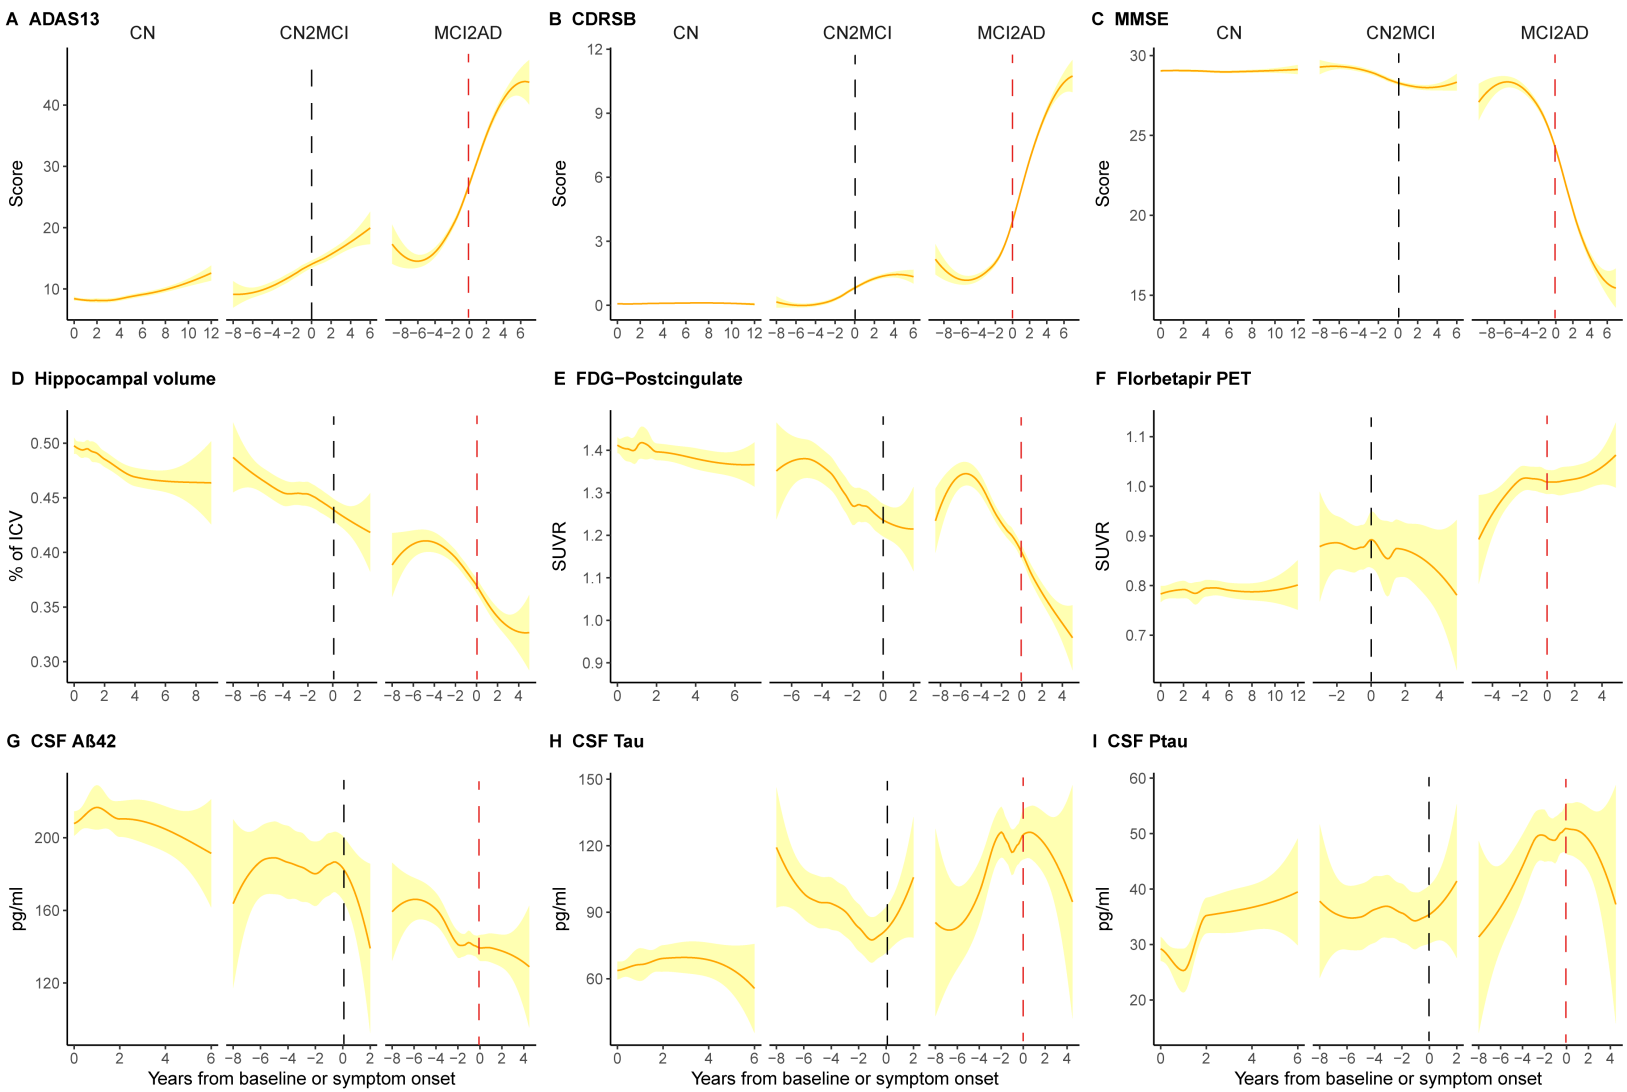

— Elevated amyloid

— Normal amyloid

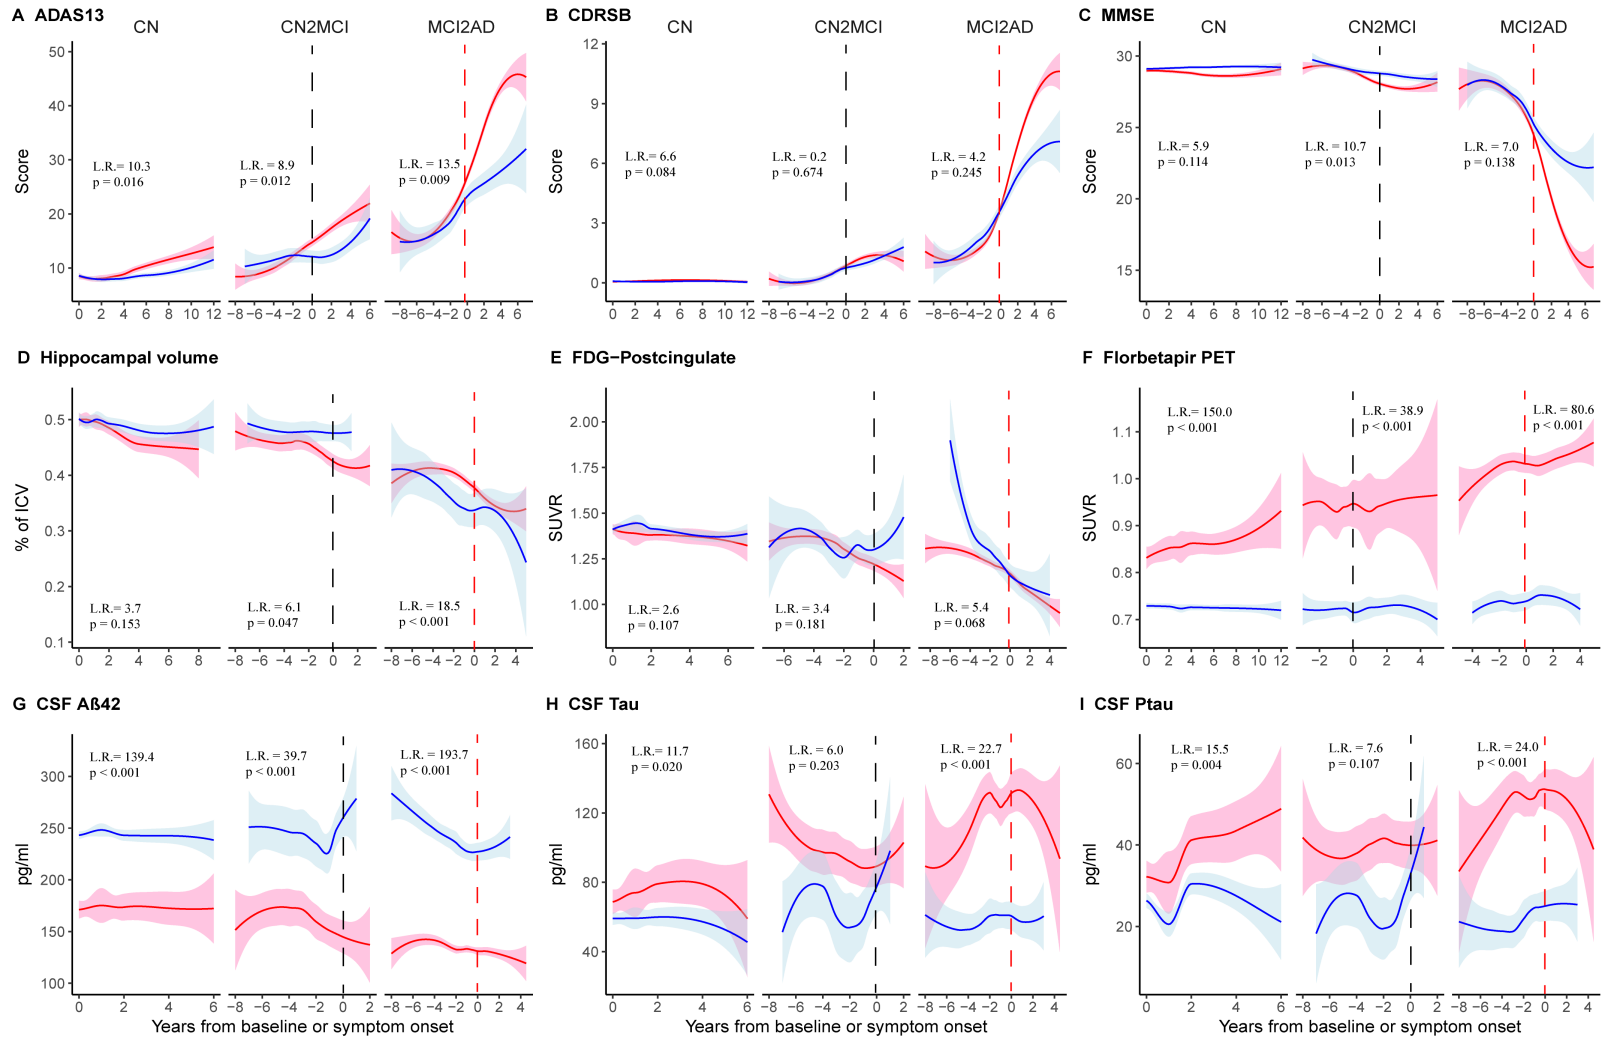

## CN Convert to MCI

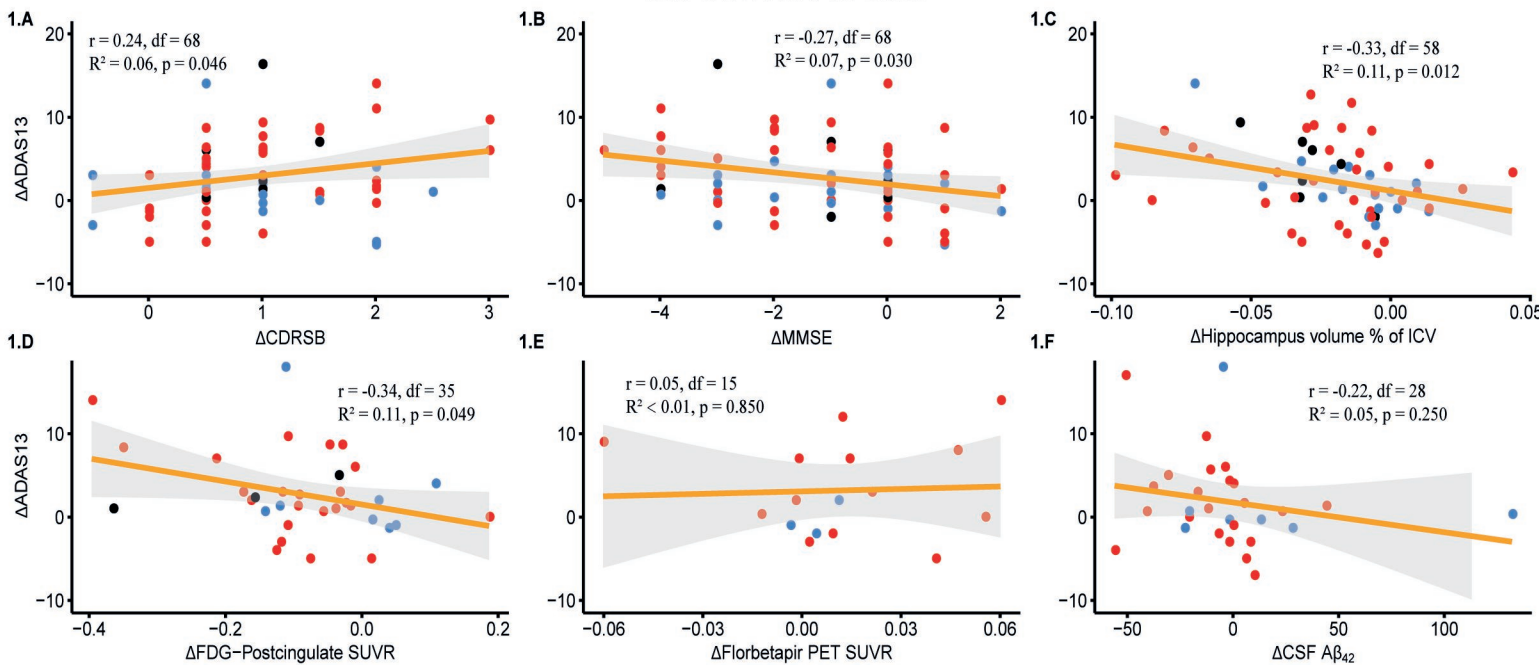

## MCI Convert to AD

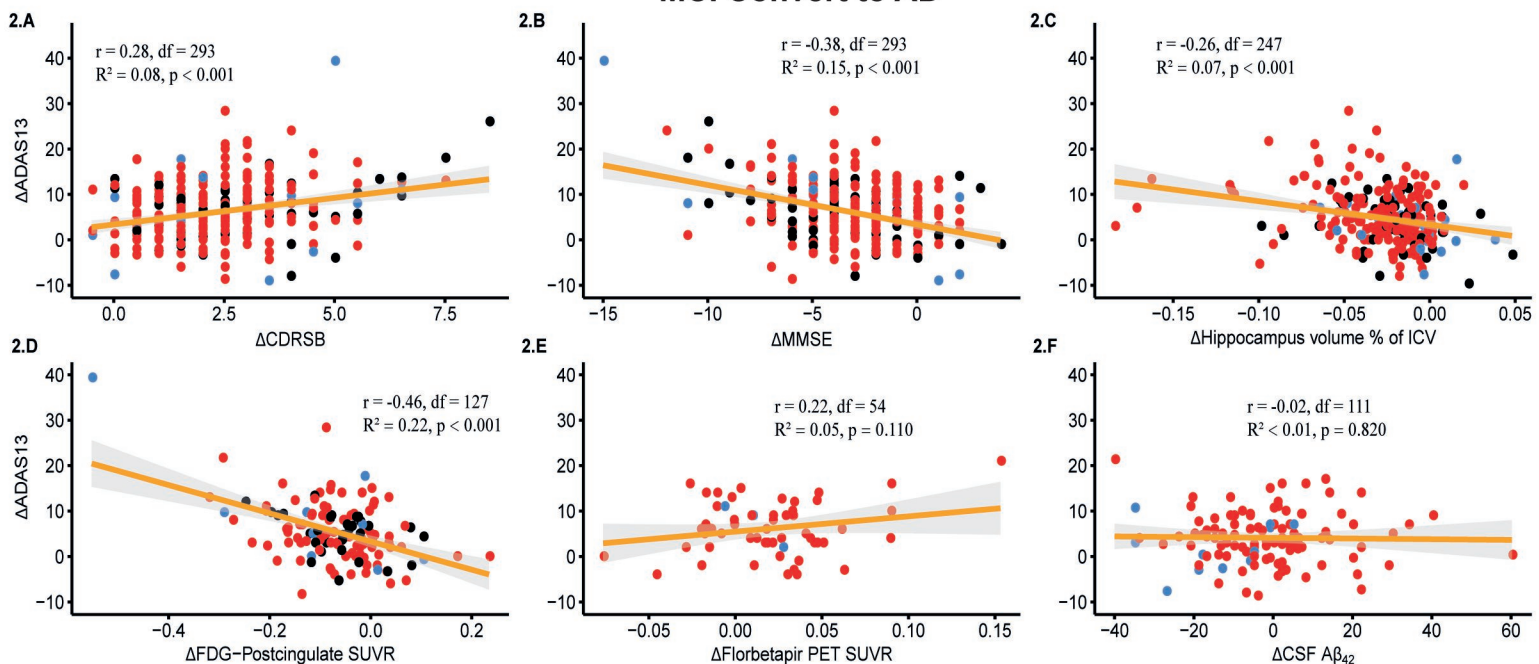

● Elevated amyloid

● Normal amyloid

● Missing amyloid

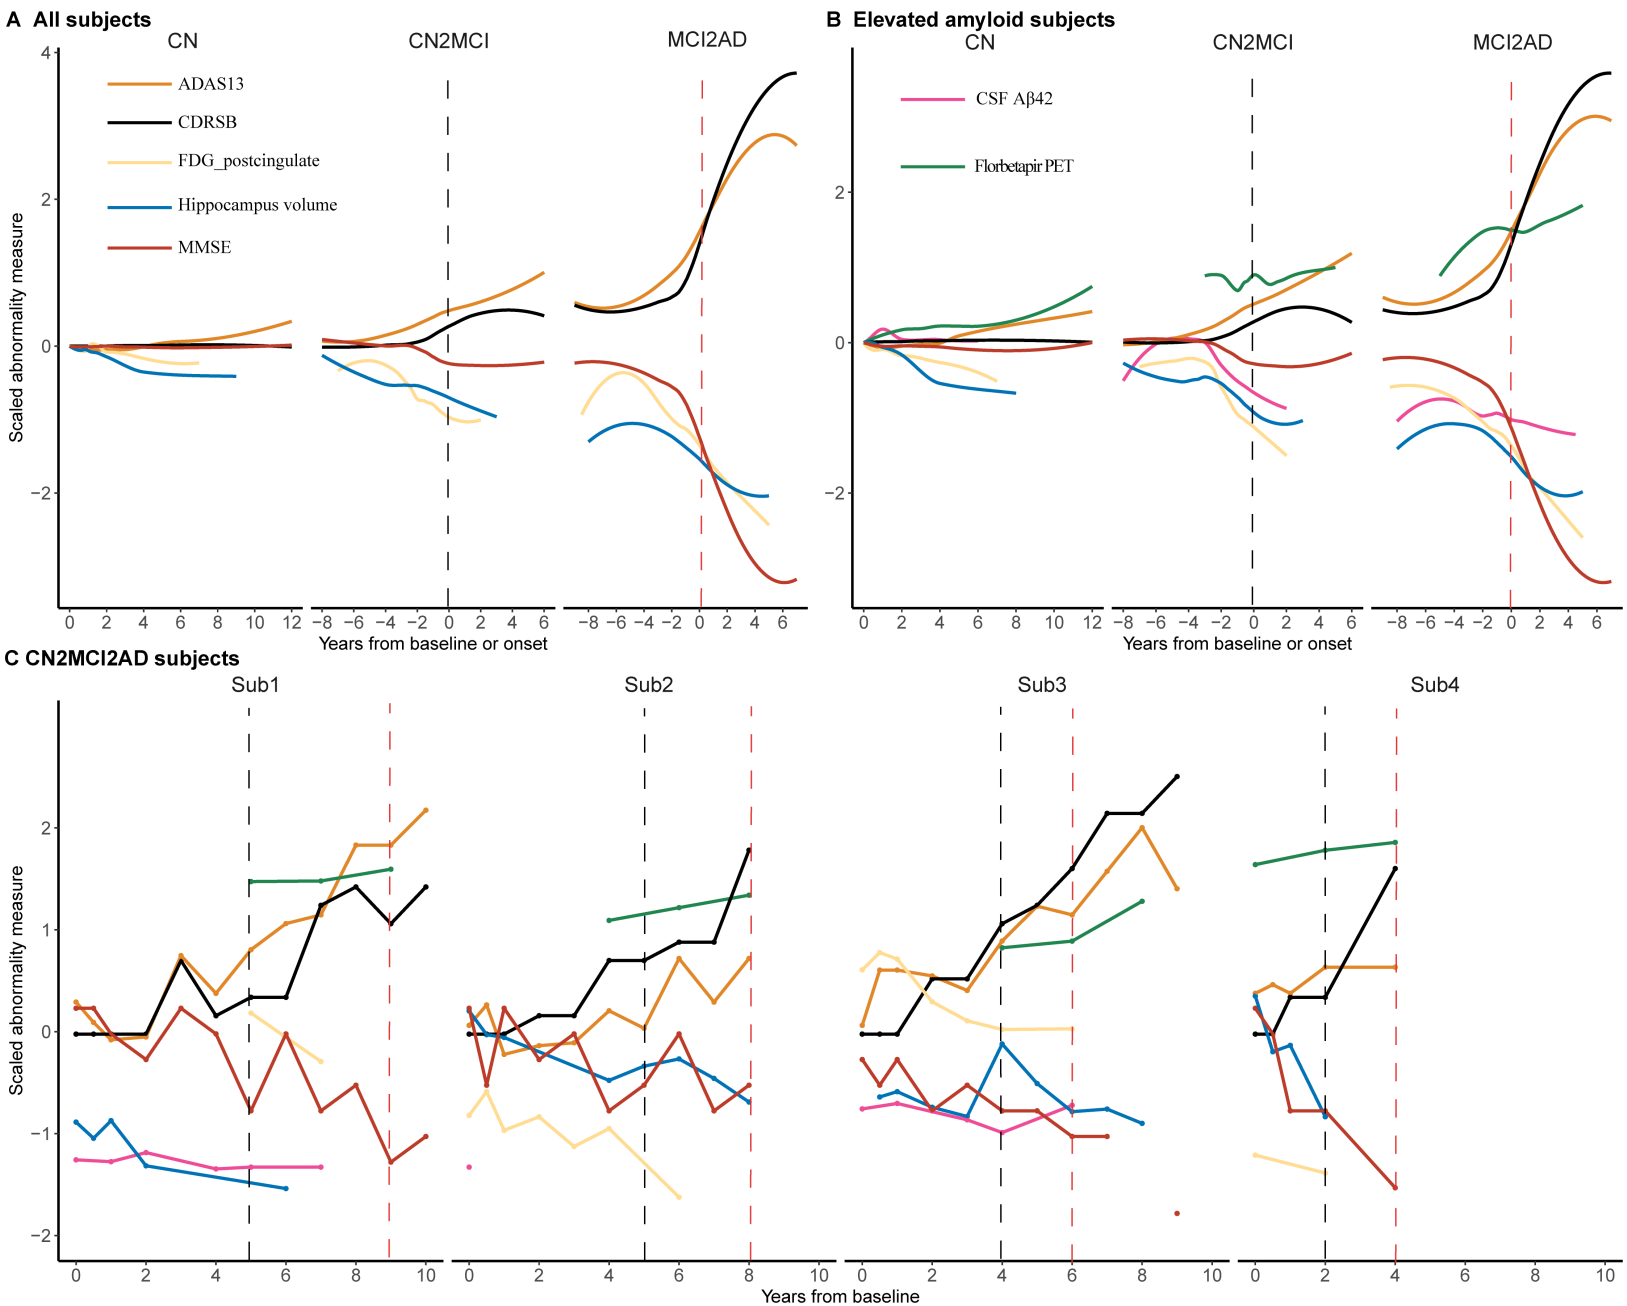

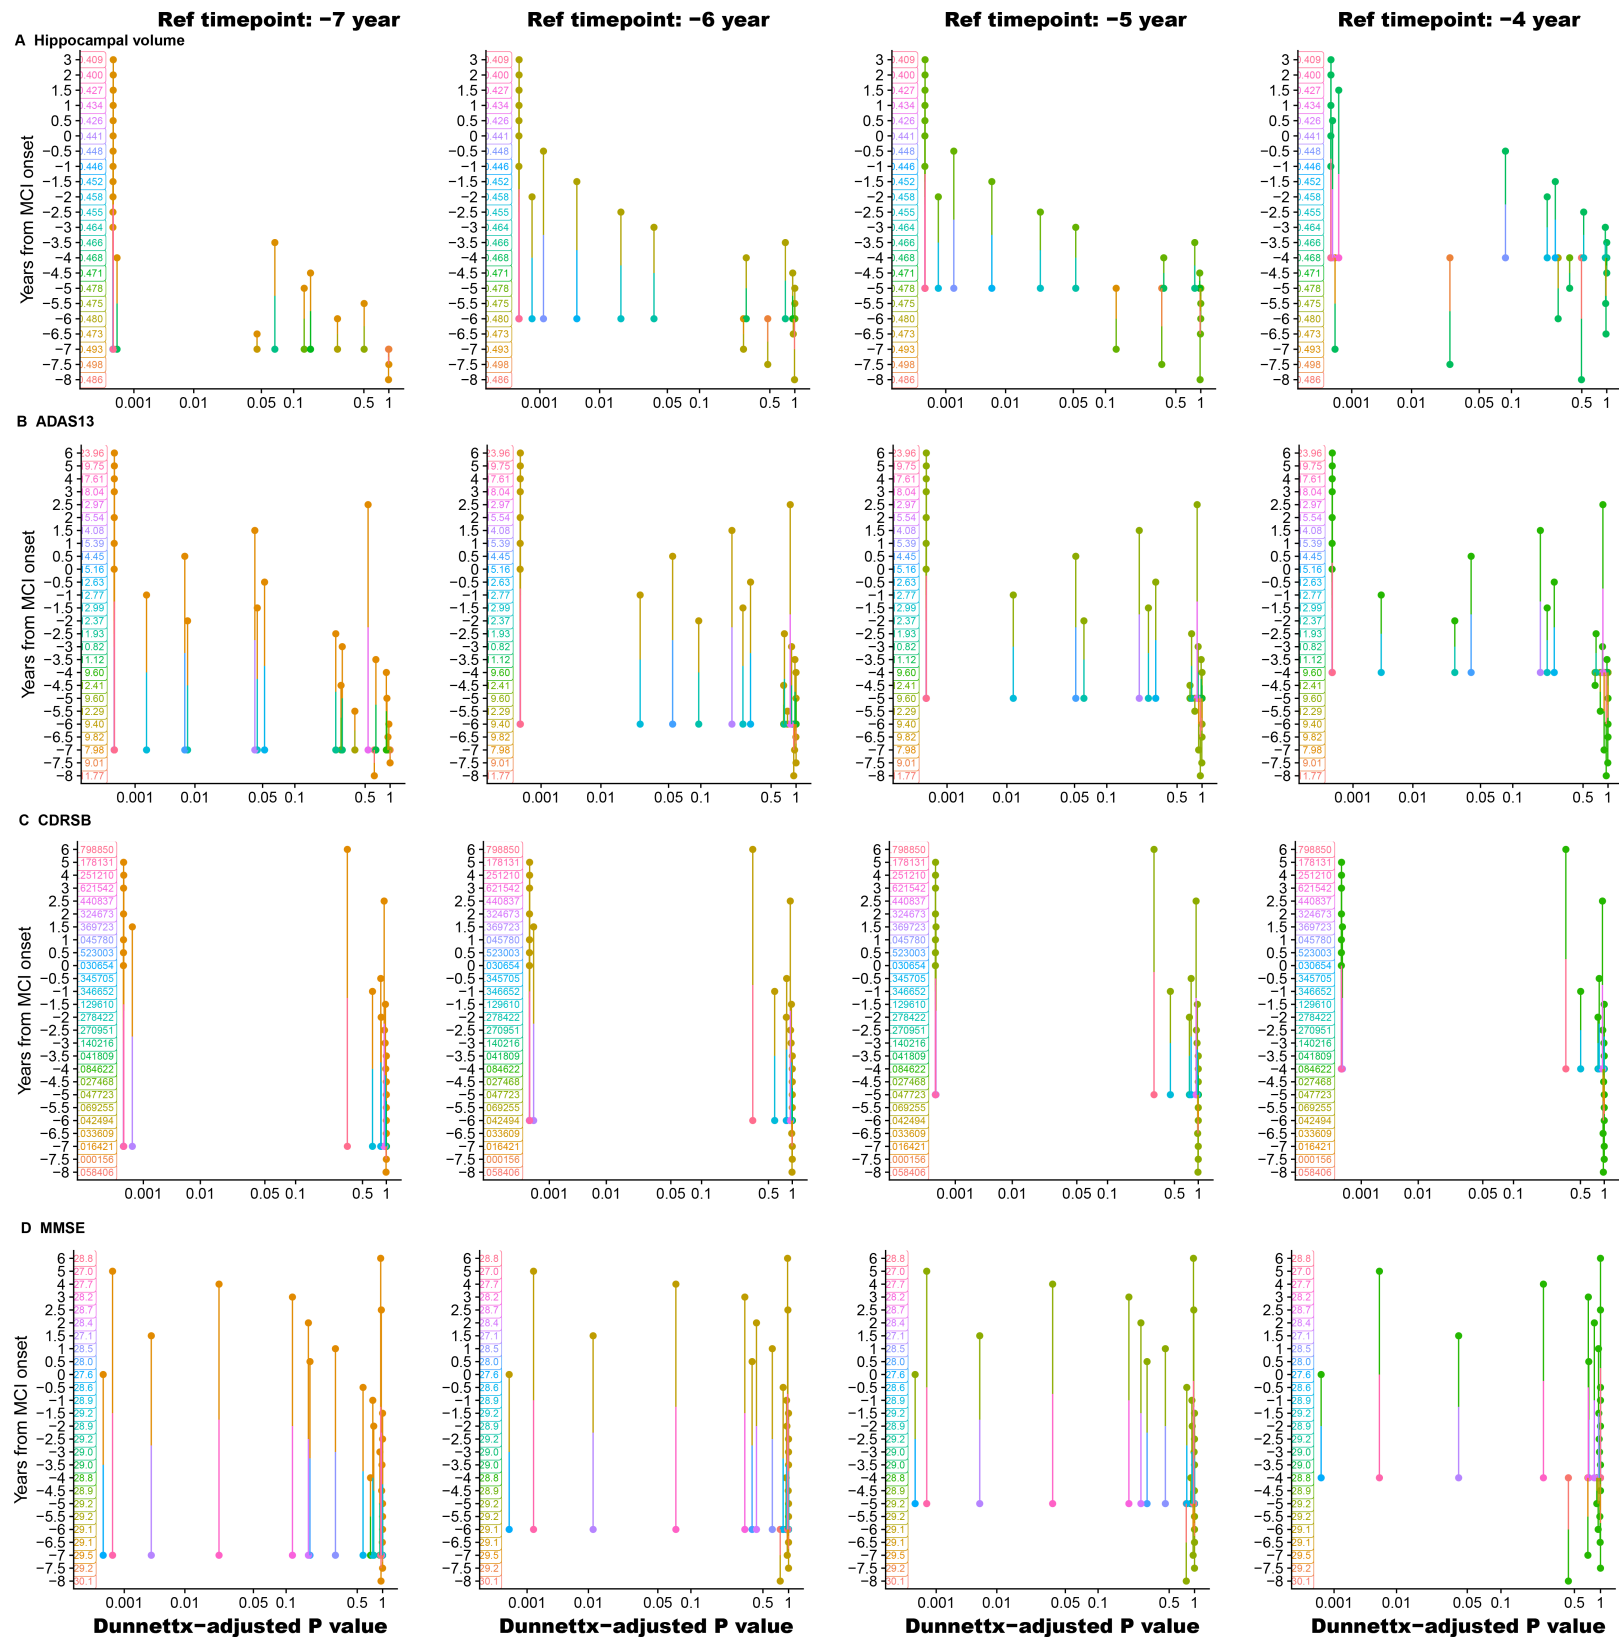

Source: https://www.biorxiv.org/content/10.1101/2020.05.08.084293v1.full.pdf
